# Supplementary material for: A quantitative model of nitrogen fixation in the presence of ammonium
Source: PLOS journal article supplement (doi:10.1371/journal.pone.0208282), 2018-11-29
Supplement: S5 (10.1371/journal.pone.0208282.s005) [file journal.pone.0208282.s005]

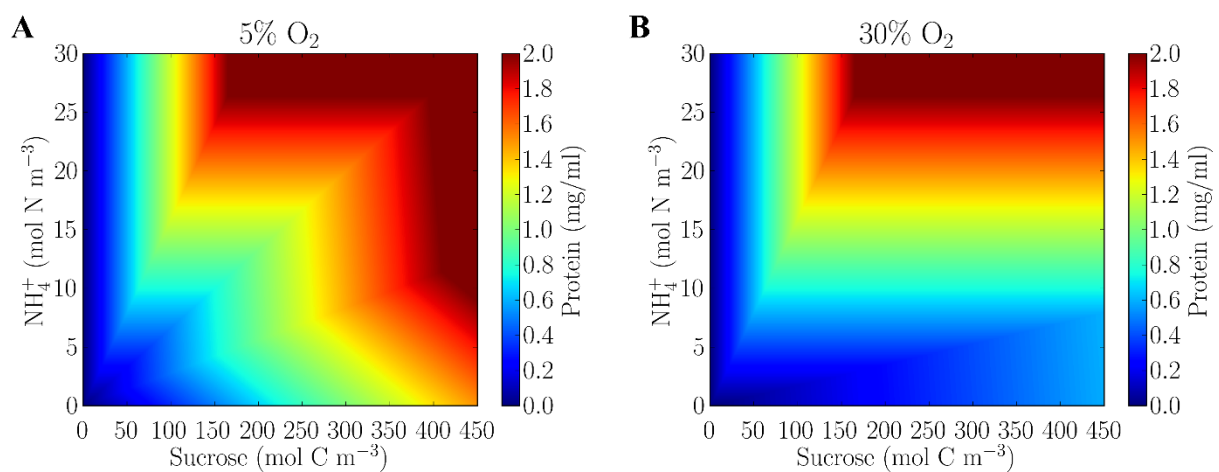

**S3 Fig. Cell density proxied by protein concentration for various sucrose and ammonium resources with different oxygen saturations. (A) 5% O<sub>2</sub> and (B) 30% O<sub>2</sub>. 100% O<sub>2</sub> equals 225 μM thus approximately O<sub>2</sub> saturation under normal air composition at 30 °C. Dilution rate is constant at 0.15 h<sup>-1</sup>.**
